# Supplementary material for: Experimental phase determination with selenomethionine or mercury-derivatization in serial femtosecond crystallography
Source: PubMed Central journal article supplement (PMC5619855; doi:10.1107/s2052252517008557), 2017-08-08
Supplement: m-04-00639-sup1.pdf [file m-04-00639-sup1.pdf]

# IUCrJ

**Volume 4 (2017)**

**Supporting information for article:**

**Experimental phase determination with selenomethionine or mercury-derivatization in serial femtosecond crystallography**

**Keitaro Yamashita, Naoyuki Kuwabara, Takanori Nakane, Tomohiro Murai, Eiichi Mizohata, Michihiro Sugahara, Dongqing Pan, Tetsuya Masuda, Mamoru Suzuki, Tomomi Sato, Atsushi Kodan, Tomohiro Yamaguchi, Eriko Nango, Tomoyuki Tanaka, Kensuke Tono, Yasumasa Joti, Takashi Kameshima, Takaki Hatsui, Makina Yabashi, Hiroshi Manya, Tamao Endo, Ryuichi Kato, Toshiya Senda, Hiroaki Kato, So Iwata, Hideo Ago, Masaki Yamamoto, Fumiaki Yumoto and Toru Nakatsu**

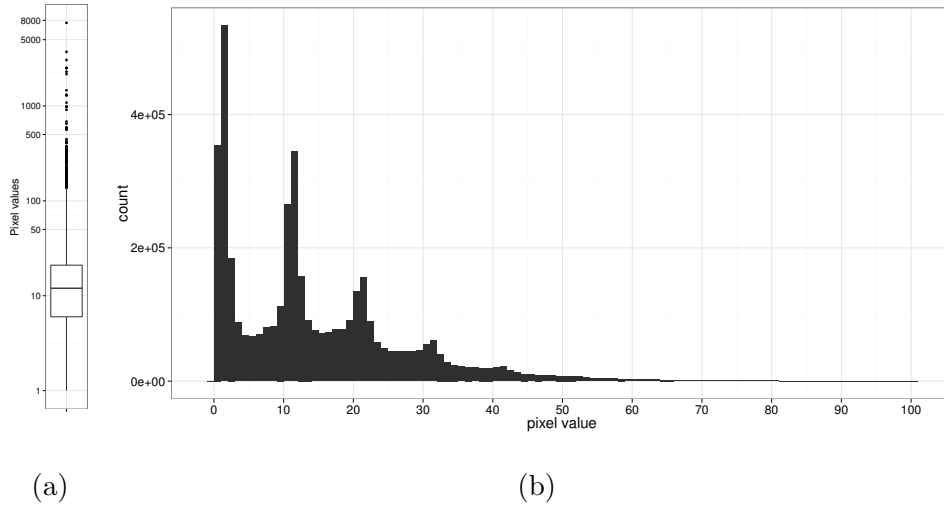

Fig. S1: **Histogram of detector pixel values.** This figure was prepared using a MPCCD image having a diffraction pattern of LRE-Hg. (a) Whole distribution. (b) Histogram in the range of 0 to 10 photons. Pixel values were scaled so that ten units correspond to one photon by Cheetah [1].

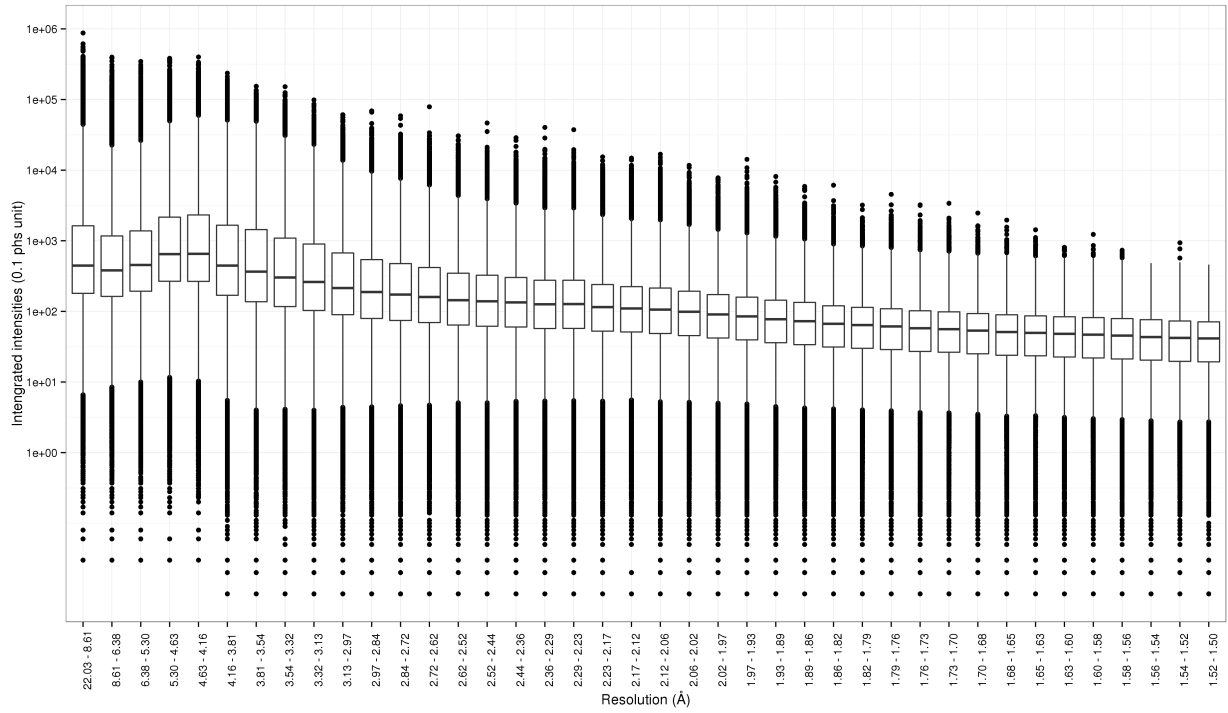

(a)

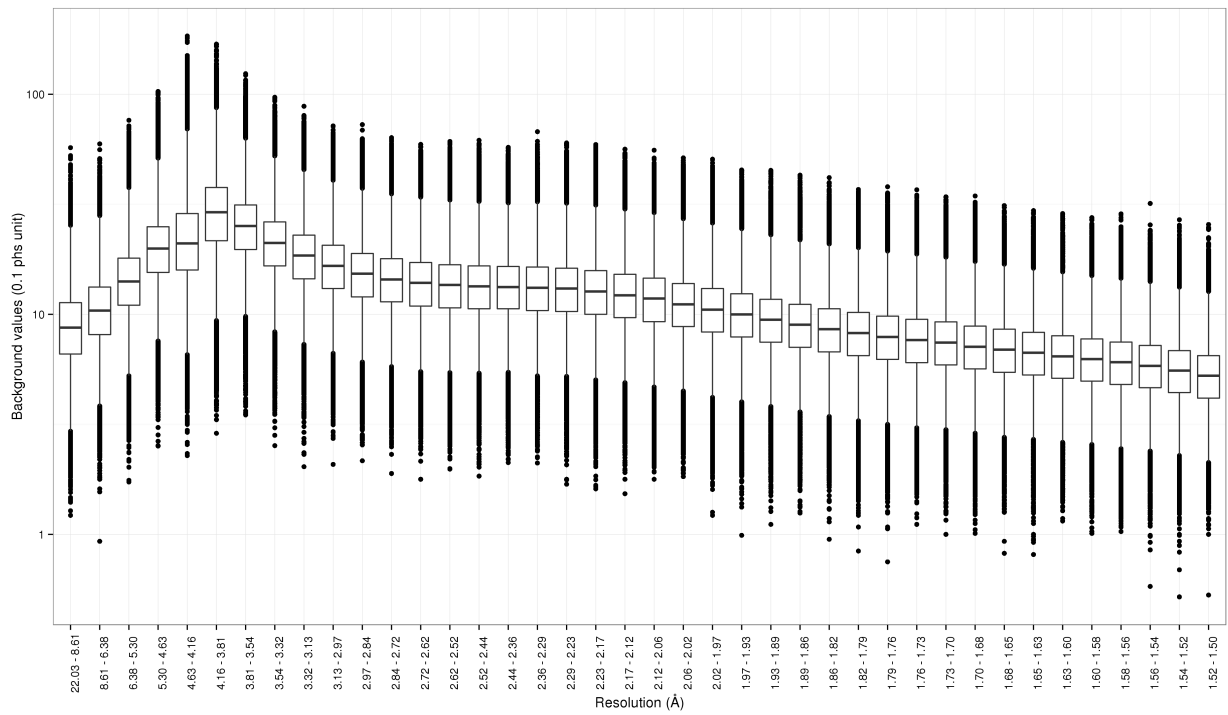

(b)

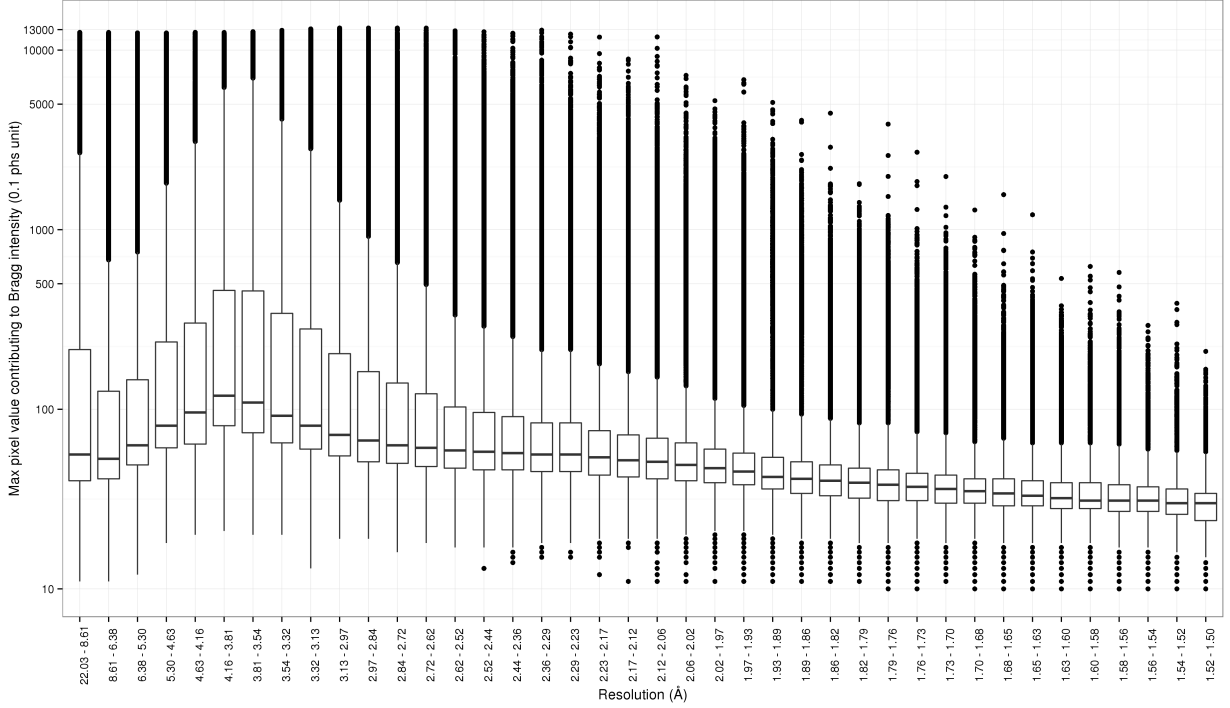

(c)

Fig. S2: Typical detector pixel values for background and Bragg spots plotted with 13,000 patterns of LRE-Hg. (a) Integrated intensity. (b) Background. (c) Maximum pixel values contributing to Bragg intensities. The pixel values were scaled so that ten units correspond to one photon by Cheetah [1]. Note that low-angle absorber masked reflections  $> \sim 3.8 \text{ \AA}$  and corrected values were shown for (a) and (b).

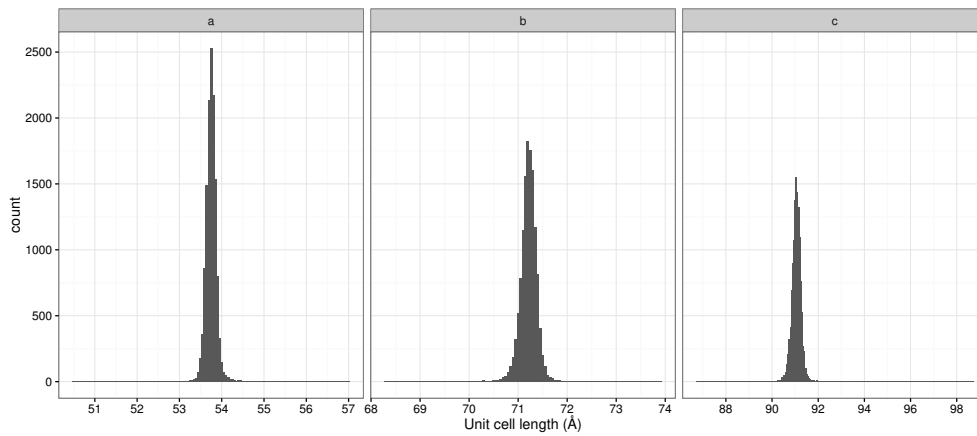

(a)

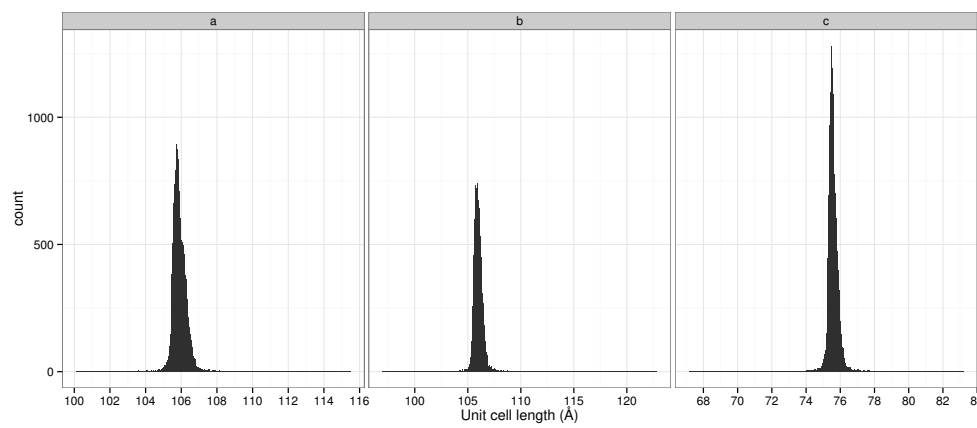

(b)

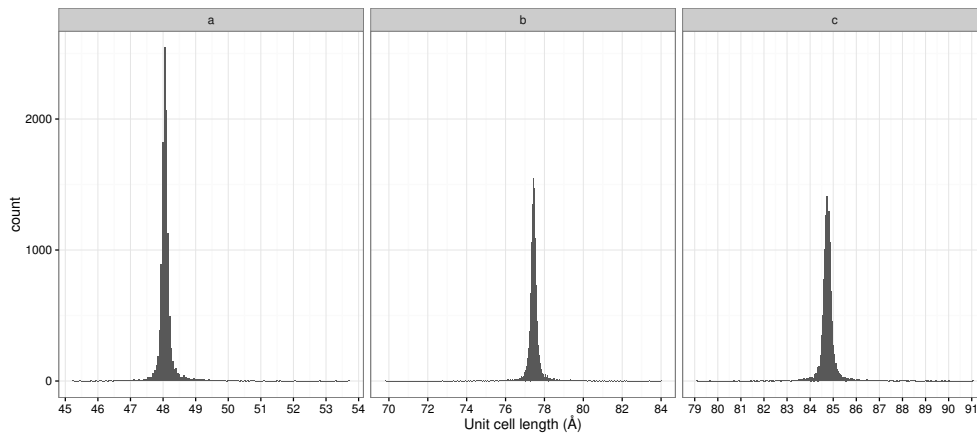

(c)

Fig. S3: **Distribution of unit cell lengths.** (a) 13,000 lattices of Stem, (b) 60,000 lattices of ACG, and (c) 11,000 lattices of LRE. Note that while crystallographically  $a = b$  in ACG case, CrystFEL does not take this constraint into account in refinement.

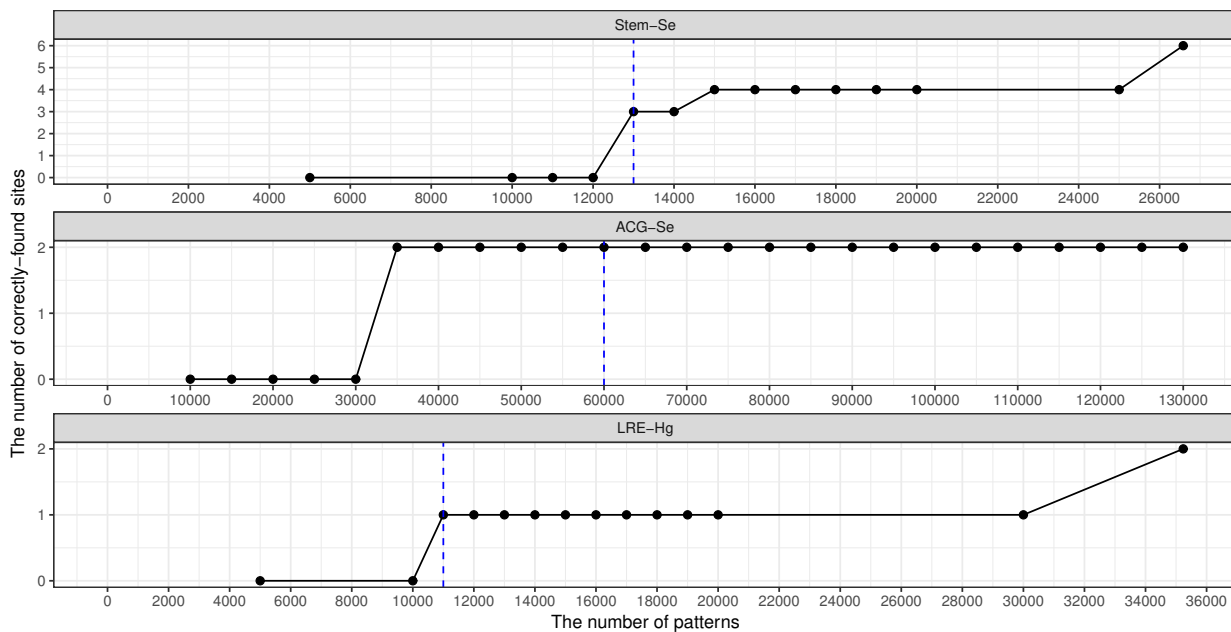

(a)

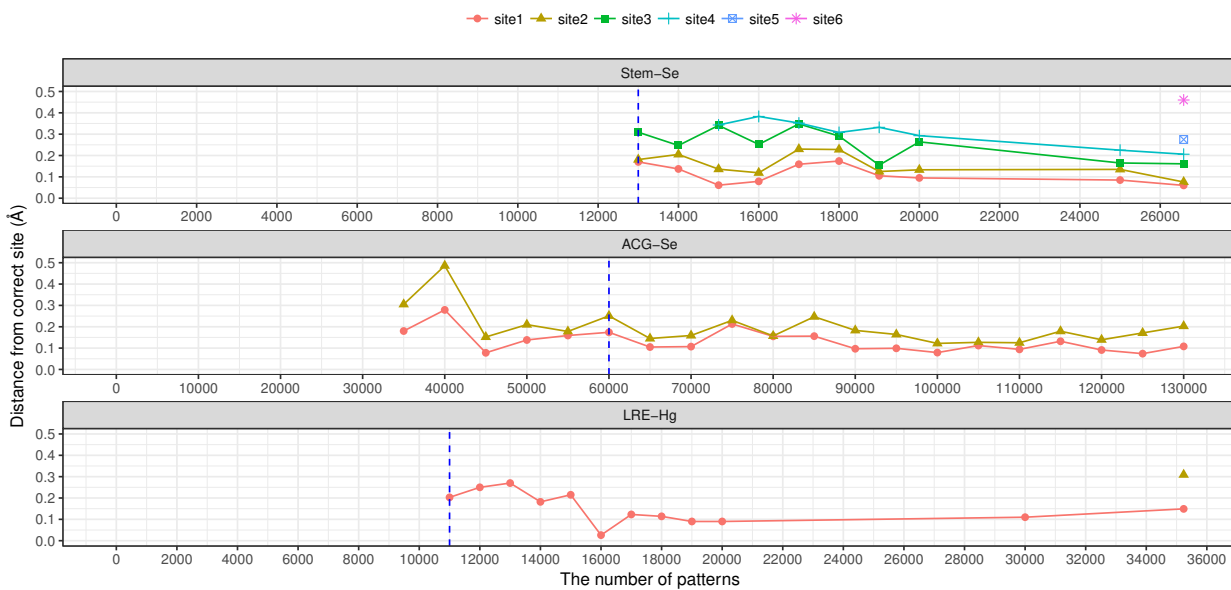

(b)

Fig. S4: **Correctness of heavy atom sites located by SHELXD.** (a) The number of correctly found heavy atom sites. (b) The distances from correct sites. The vertical dashed lines indicate the number of patterns required for successful SAD phasing. Site accuracy was evaluated with phenix.emma [2] by comparing sites in the refined model with the tolerance for matching of  $0.5 \text{ \AA}$ .

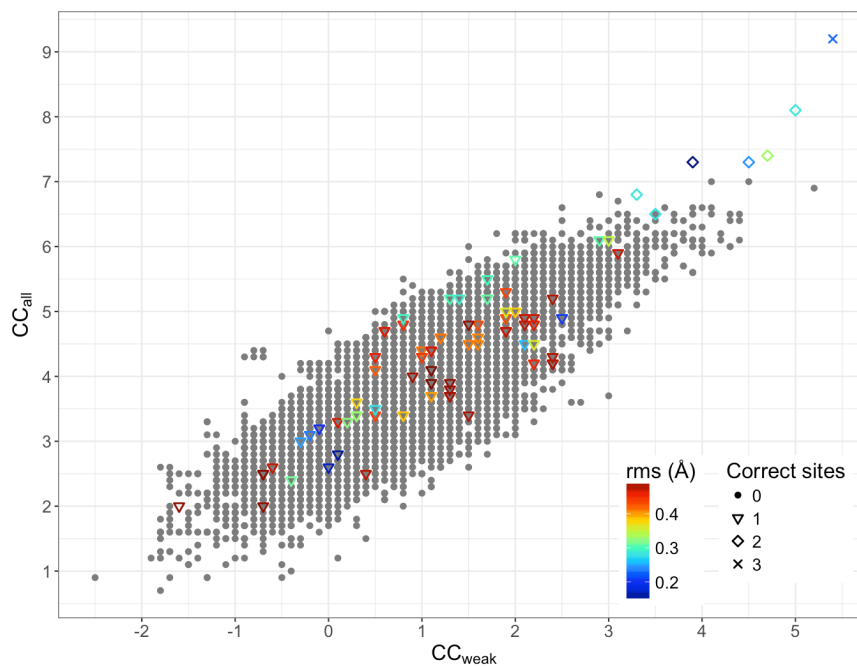

(a)

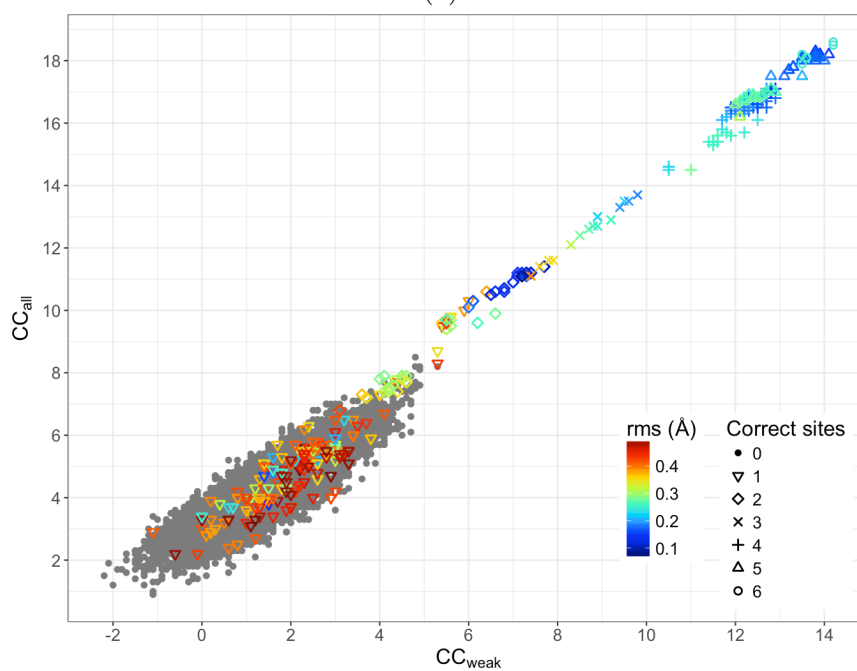

(b)

Fig. S5: **Distribution of  $CC_{all}$  and  $CC_{weak}$  in SHELXD** with (a) 13,000 patterns and (b) all (26,584) patterns of Stem-Se. Site accuracy was evaluated with phenix.emma [2] by comparing Se sites in refined model with the tolerance for matching of  $0.5 \text{ \AA}$ .

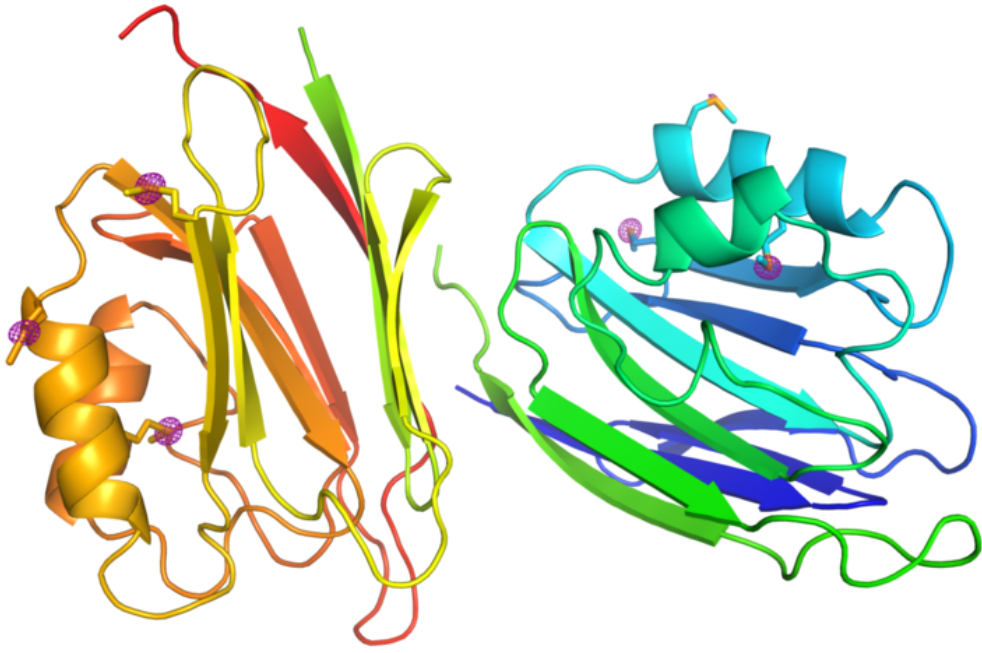

(a)

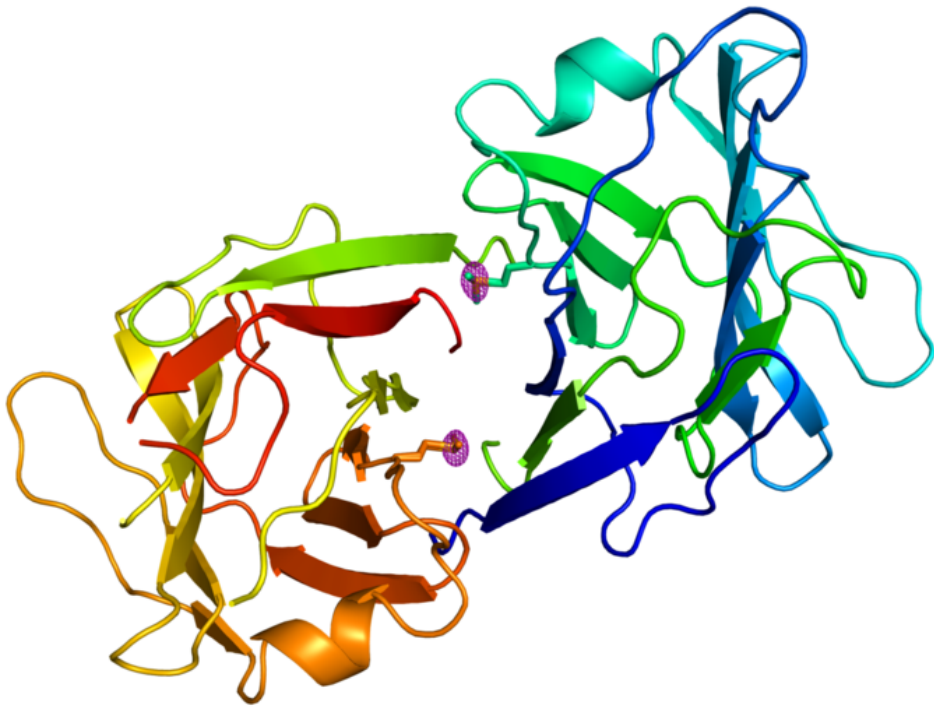

(b)



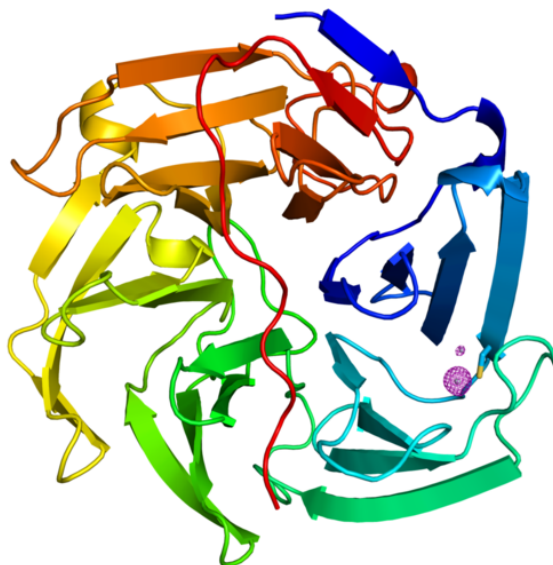

(c)

Fig. S6: Refined models and anomalous difference Fourier maps of (a) Stem, (b) ACG, (c) LRE. Anomalous difference Fourier maps are contoured at  $6.0\sigma$ .

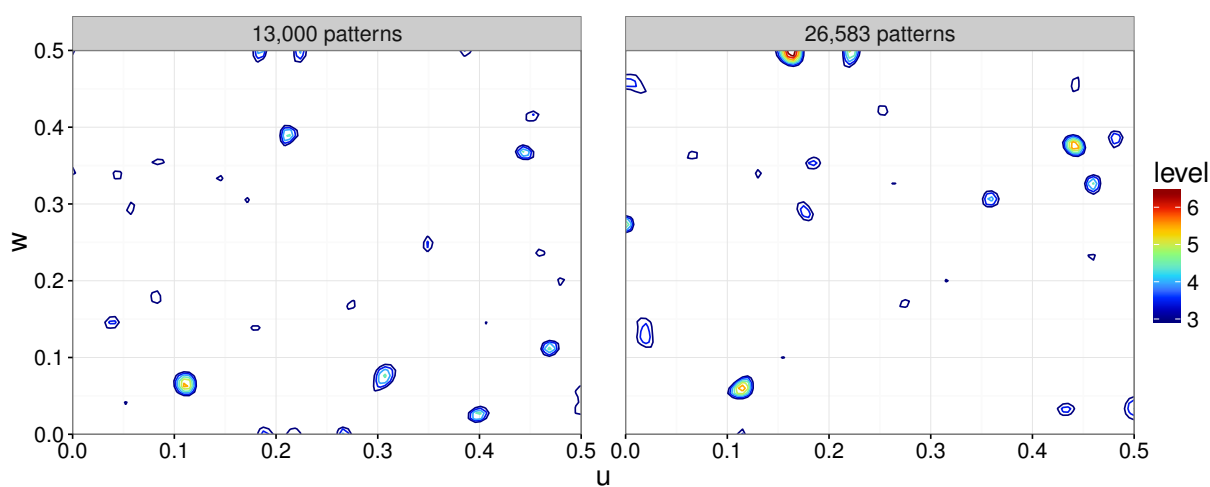

Fig. S7: Anomalous difference Patterson maps of Stem-Se in  $v = 1/2$  Harker section using 13,000 and 26,583 patterns. Patterson map was calculated using the CCTBX functionality [3] with anomalous differences estimated by SHELXC [4]. The map values are scaled using the root mean square value. Figure was prepared using R [5] with ggplot2 package [6].

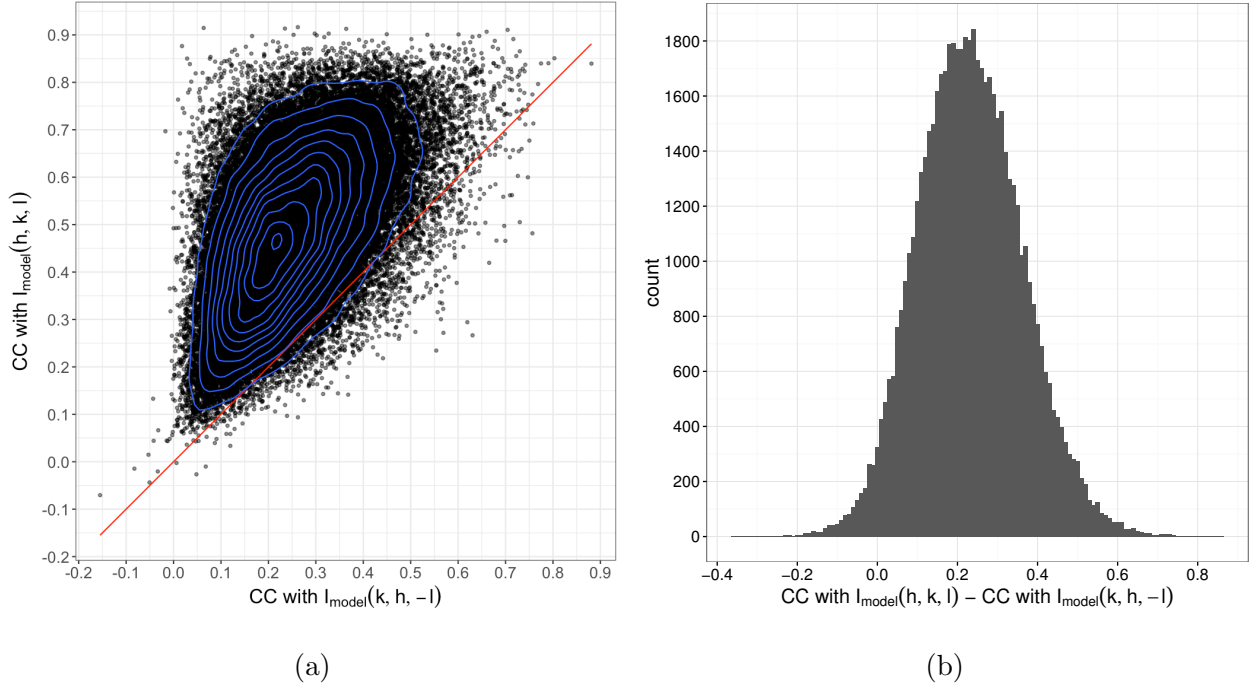

Fig. S8: **Validation of indexing ambiguity resolution.** Correlation coefficients between measured intensities of each pattern  $I_{\text{part}}$  and squared calculated structure amplitudes of refined model  $I_{\text{model}}$  were calculated. Indices of each pattern were reindexed by ambigator. (a) Scatter plot of  $\text{CC}[I_{\text{part}}(hkl), I_{\text{model}}(hkl)]$  and  $\text{CC}[I_{\text{part}}(hkl), I_{\text{model}}(kh\bar{l})]$ , and (b) histogram of  $\text{CC}[I_{\text{part}}(hkl), I_{\text{model}}(hkl)] - \text{CC}[I_{\text{part}}(hkl), I_{\text{model}}(kh\bar{l})]$  are shown for the first 60,000 patterns. The result shows indexing ambiguity was correctly resolved for majority of patterns.

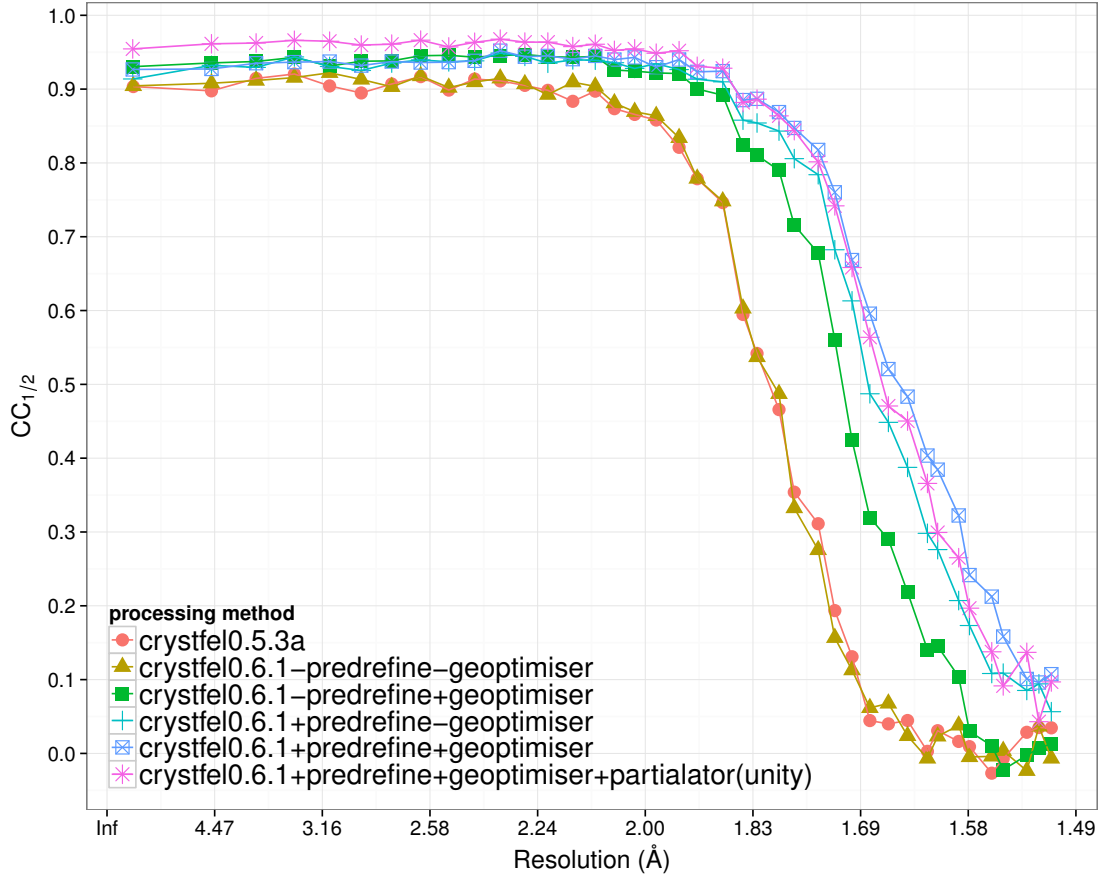

Fig. S9: **Detailed comparison of CrystFEL versions and features using LRE-Hg crystals.** The features of CrystFEL 0.6.1 were compared. ‘Predrefine’ (‘prediction refinement’) refines the crystal orientation matrix and detector shifts for each image. Without prediction refinement and geoptimiser, the result was comparable with those obtained using CrystFEL 0.5.3a. The most notable improvement was attributed to prediction refinement, and additional improvement was achieved with geoptimiser. In particular, partialator improved low-resolution data quality. The numbers of indexed patterns were 34,393 (CrystFEL0.5.3a), 35,951 (CrystFEL0.6.1–predrefine–geoptimiser), 40,170 (CrystFEL0.6.1–predrefine+geoptimiser), 34,219 (CrystFEL0.6.1+predrefine–geoptimiser), 35,235 (CrystFEL0.6.1+predrefine+geoptimiser), and 35,231 (CrystFEL0.6.1+predrefine+geoptimiser+partialator). The figure was prepared in R [5] with the ggplot2 package [6].

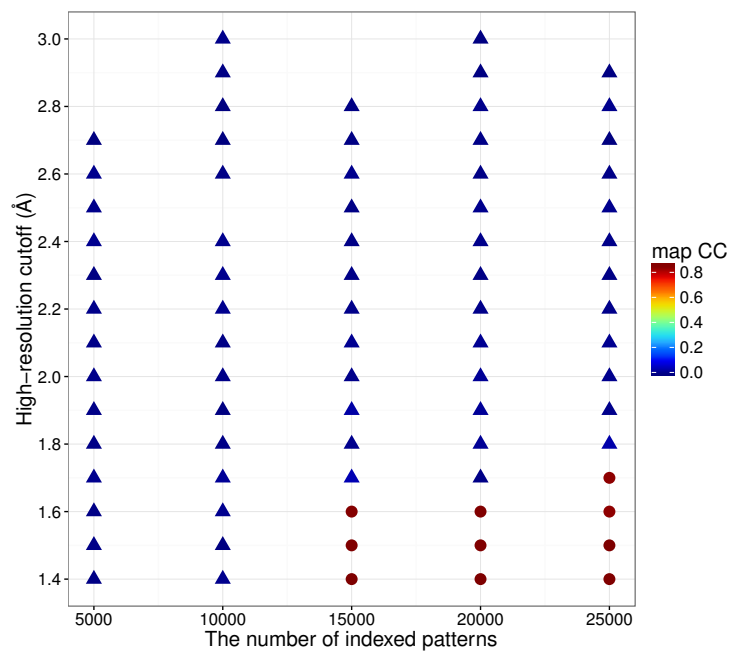

(a)

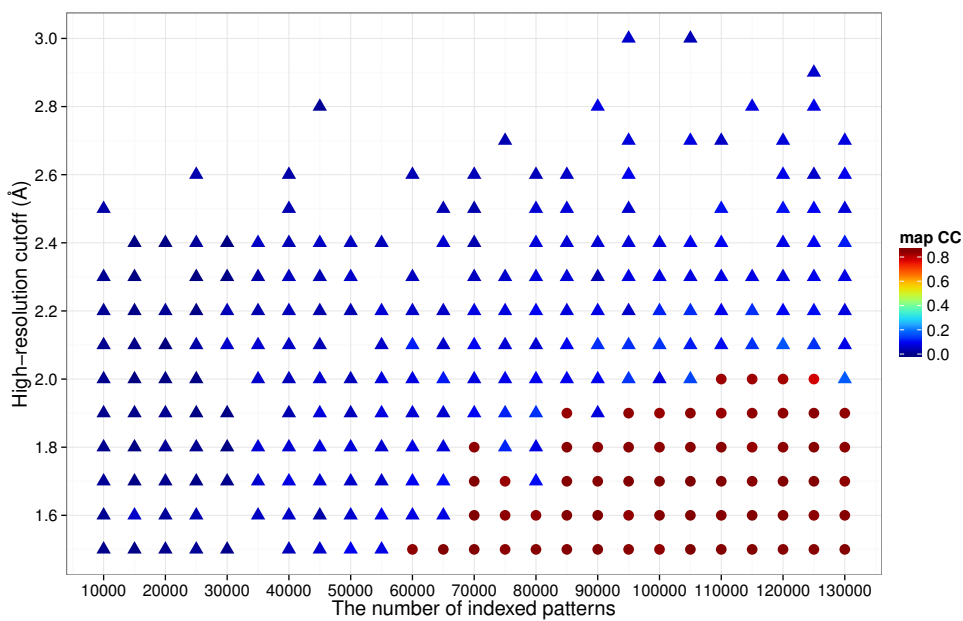

(b)

Fig. S10: Effect of the high-resolution cutoff and number of patterns in (a) Stem and (b) ACG case. For LRE-Hg case, see Fig. 5 in the main text.

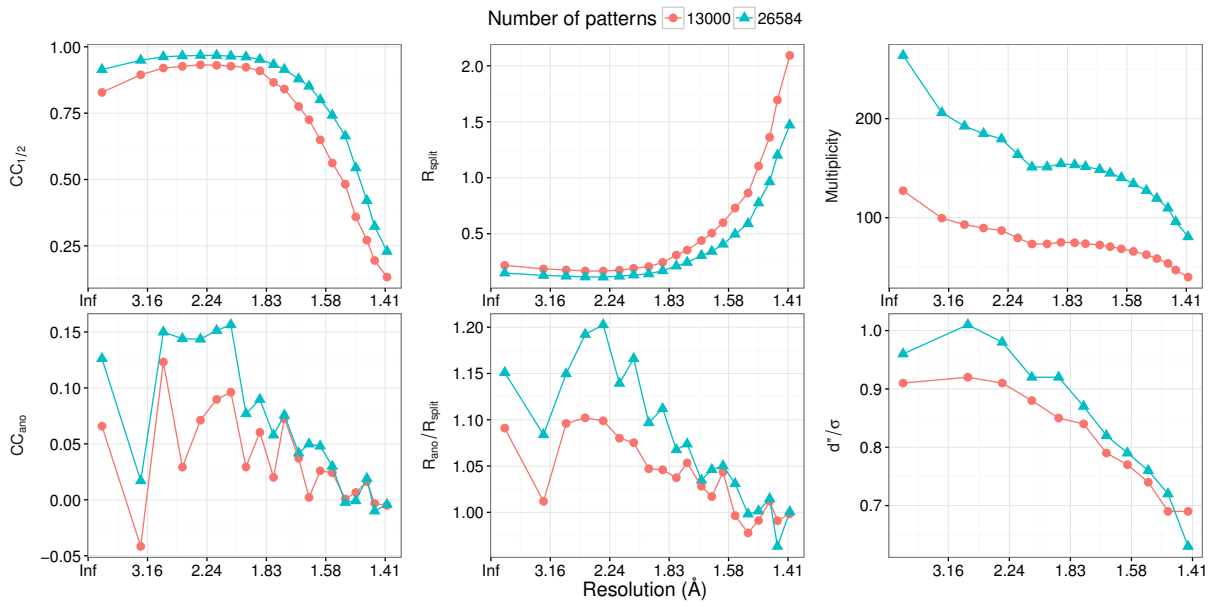

(a)

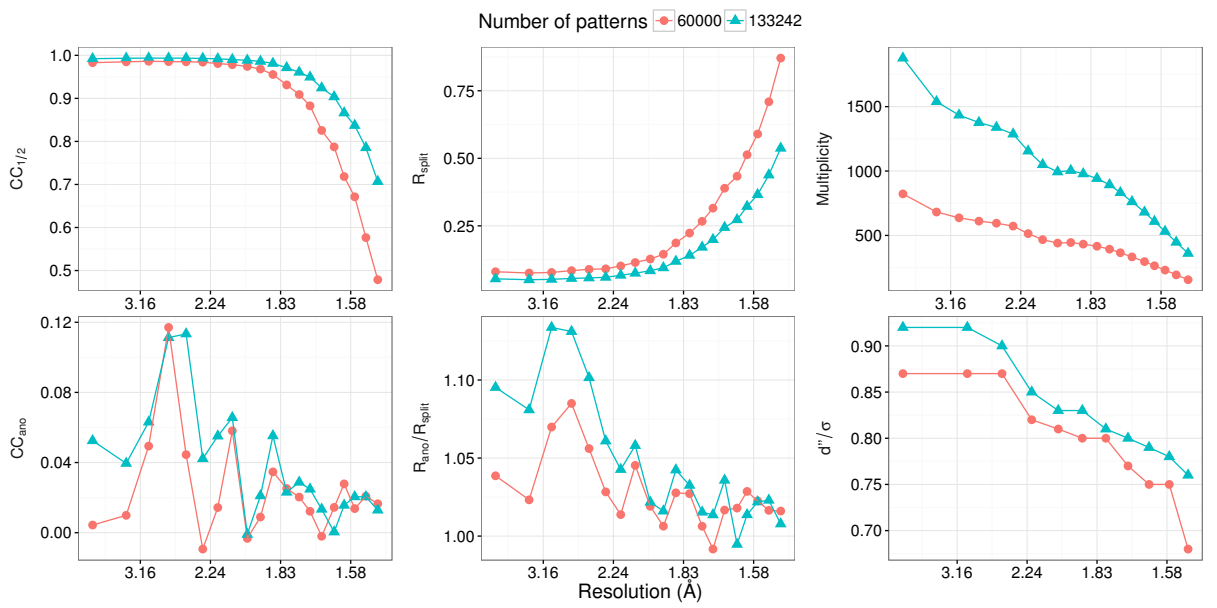

(b)

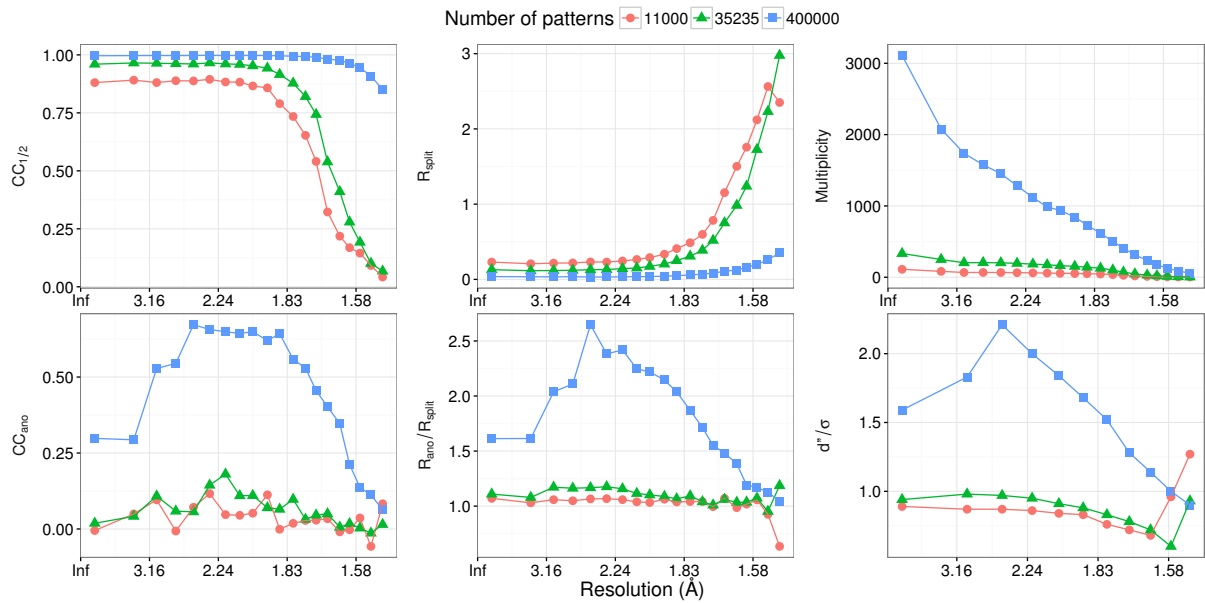

(c)

Fig. S11: Data processing statistics in resolution shells.  $CC_{1/2}$ ,  $R_{split}$ , multiplicity,  $CC_{ano}$ ,  $R_{ano}/R_{split}$ , and  $d''/\sigma$  are shown. (a) Stem. (b) ACG. (c) LRE.

Table S1: XFEL experimental parameters

|                                                                                            | LRE-Hg                                                               |                                 | LRE-Hg<br>(additional)                                                  |                                 | Stem-Se                            |                                 | ACG-Se                                           |                                  |
|--------------------------------------------------------------------------------------------|----------------------------------------------------------------------|---------------------------------|-------------------------------------------------------------------------|---------------------------------|------------------------------------|---------------------------------|--------------------------------------------------|----------------------------------|
| Carrier                                                                                    | Super<br>(#21030,<br>Chemical Co.)                                   | Lube<br>Synco<br>(Synco<br>Co.) | Super<br>(#21030,<br>Chemical Co.)                                      | Lube<br>Synco<br>(Synco<br>Co.) | Super<br>(#21030,<br>Chemical Co.) | Lube<br>Synco<br>(Synco<br>Co.) | Super<br>Nuclear<br>(#42150,<br>Chemical Co.)    | Lube<br>grease<br>(Synco<br>Co.) |
| Crystal size<br>( $\mu\text{m}$ ) and shape                                                | 2–5 $\times$ 10–30, rod<br>shape                                     |                                 | 2–5 $\times$ 10–30, rod<br>shape                                        |                                 | 10–30, cube-like                   |                                 | 5–50 $\times$ 10–60,<br>hexagonal prism<br>shape |                                  |
| Filter pore size<br>( $\mu\text{m}$ )                                                      | 30                                                                   |                                 | 30                                                                      |                                 | 30                                 |                                 | 30                                               |                                  |
| Crystal density<br>in stream (/mL)                                                         | $2 \times 10^7$                                                      |                                 | $7.8 \times 10^7$                                                       |                                 | $1.6 \times 10^7$                  |                                 | $1.2 \times 10^7$                                |                                  |
| Nozzle inner di-<br>ameter ( $\mu\text{m}$ )                                               | 110                                                                  |                                 | 110                                                                     |                                 | 160                                |                                 | 150                                              |                                  |
| Flow rate<br>( $\mu\text{L}/\text{min}$ , $\mu\text{m}/\text{s}$ )                         | 0.48–0.50 / 876                                                      |                                 | 0.25 / 438                                                              |                                 | 0.50 / 417                         |                                 | 0.625 / 590                                      |                                  |
| Beam size<br>(width $\times$ height<br>/ $\mu\text{m}$ )                                   | $2.1 \times 2$                                                       |                                 | $2.3 \times 1.4$                                                        |                                 | $1.9 \times 1.21$                  |                                 | $1.4 \times 1.2$                                 |                                  |
| Photon energy<br>(keV)                                                                     | 12.6                                                                 |                                 | 12.6                                                                    |                                 | 13.0                               |                                 | 13.0                                             |                                  |
| Energy band-<br>width (FWHM,<br>eV)                                                        | n/a                                                                  |                                 | 44                                                                      |                                 | 92                                 |                                 | 51                                               |                                  |
| Attenuators<br>(transmittance)                                                             | Al 300 $\mu\text{m}$ +/- Si<br>100 $\mu\text{m}$ (36.4%<br>or 24.9%) |                                 | None, Al 25 $\mu\text{m}$ ,<br>or Al 50 $\mu\text{m}$<br>(91.9%, 84.5%) |                                 | None                               |                                 | None or Al 50<br>$\mu\text{m}$ (85.8%)           |                                  |
| Averaged<br>beam energy <sup>†</sup><br>( $\mu\text{J}/\text{pulse}$ )                     | 86.4                                                                 |                                 | 97.6                                                                    |                                 | 192.8                              |                                 | 296                                              |                                  |
| Detector dis-<br>tance (edge<br>resolution)                                                | 81.4–82.2 mm<br>(1.7 Å)                                              |                                 | 55.5 mm (1.36<br>Å)                                                     |                                 | 54.3 mm (1.30<br>Å)                |                                 | 55 mm (1.32 Å)                                   |                                  |
| Low-angle ab-<br>sorber (Al<br>thickness / $\mu\text{m}$ ,<br>boundary resolu-<br>tion /Å) | 300 / 3.8                                                            |                                 | 300 / 2.7                                                               |                                 | Not used                           |                                 | Not used                                         |                                  |

<sup>†</sup>XFEL beam energy at sample position calculated from the reflectivity or transmittance of the components between the beam monitor and the sample position (attenuator, KB-mirrors, Be windows, and air path).

Table S2: Data collection and refinement statistics of Stem-SeMet derivative

|                                                                 | minimum patterns      | all patterns          |
|-----------------------------------------------------------------|-----------------------|-----------------------|
| Space group                                                     | $P2_12_12$            | $P2_12_12$            |
| Unit cell ( $a, b, c$ ; Å)                                      | 71.2, 91.1, 53.8      | 71.2, 91.1, 53.8      |
| Resolution range <sup>†</sup> (Å)                               | 24.0–1.40 (1.46–1.40) | 24.0–1.40 (1.46–1.40) |
| Completeness <sup>†</sup> (%)                                   | 100 (100)             | 100 (100)             |
| SFX multiplicity <sup>†</sup>                                   | 74.3 (44.3)           | 152.7 (89.9)          |
| No. crystals                                                    | 13,000                | 26,583                |
| $R_{\text{split}}$ <sup>‡§</sup>                                | 0.2115 (1.838)        | 0.1451 (1.302)        |
| $\langle I/\sigma(I) \rangle$                                   | 3.3 (0.63)            | 4.7 (0.87)            |
| $\text{CC}_{1/2}$ <sup>†#</sup>                                 | 0.9321 (0.1727)       | 0.9679 (0.2877)       |
| $\text{CC}_{\text{ano}}$ <sup>*</sup>                           | 0.03967               | 0.09875               |
| <b>SAD phasing</b>                                              |                       |                       |
| $\text{CC}_{\text{all}}, \text{CC}_{\text{weak}}$ (%; SHELXD)   | 9.21, 5.42            | 18.55, 14.19          |
| Built residues, CC, FOM (SHELXE)                                | 285, 42.5%, 0.649     | 291, 46.68%, 0.688    |
| Rebuilt residues, $R_{\text{work}}/R_{\text{free}}$ (Buccaneer) | 300, 24.2%/31.6%      | 307, 25.2%/30.3%      |
| <b>Refinement</b>                                               |                       |                       |
| $R_{\text{work}}, R_{\text{free}}$                              | 0.1704, 0.2067        | 0.1609, 0.1901        |
| No. atoms (mean $B$ -factor)                                    |                       |                       |
| protein                                                         | 2346 (25.1)           | 2346 (24.9)           |
| water                                                           | 171 (39.0)            | 171 (38.6)            |
| ligand                                                          | 42 (27.1)             | 42 (26.7)             |
| r.m.s. deviation from ideal                                     |                       |                       |
| bond lengths (Å)                                                | 0.005                 | 0.005                 |
| bond angles (°)                                                 | 1.026                 | 1.033                 |
| Ramachandran plot                                               |                       |                       |
| Favored (%)                                                     | 98.68                 | 98.68                 |
| Allowed (%)                                                     | 1.32                  | 1.32                  |
| Outlier (%)                                                     | 0                     | 0                     |

<sup>†</sup>Values in parenthesis are for the highest-resolution shell.

$\S R_{\text{split}} = \frac{1}{\sqrt{2}} \frac{\sum_{hkl} |I_{hkl}^{\text{even\_images}} - I_{hkl}^{\text{odd\_images}}|}{\sum_{hkl} (I_{hkl}^{\text{even\_images}} + I_{hkl}^{\text{odd\_images}})/2}$  [7], # $\text{CC}_{1/2}$  is a correlation coefficient of intensities between randomly halved datasets [8]. \* $\text{CC}_{\text{ano}}$  is a correlation coefficient of anomalous intensity differences between randomly halved datasets.



Table S3: Data collection and refinement statistics of ACG-SeMet derivative

|                                                                 | minimum patterns     | all patterns         |
|-----------------------------------------------------------------|----------------------|----------------------|
| Space group                                                     | $P6_5$               | $P6_5$               |
| Unit cell ( $a = b, c$ ; Å)                                     | 105.8, 75.5          | 105.8, 75.5          |
| Resolution range <sup>†</sup> (Å)                               | 9.5–1.50 (1.56–1.50) | 9.5–1.50 (1.56–1.50) |
| Completeness <sup>†</sup> (%)                                   | 100 (100)            | 100 (100)            |
| SFX multiplicity <sup>†</sup>                                   | 443.4 (179.0)        | 1004.5 (413.2)       |
| No. crystals                                                    | 60,000               | 133,242              |
| $R_{\text{split}}$                                              | 0.0958 (0.768)       | 0.0633 (0.475)       |
| $\langle I/\sigma(I) \rangle$                                   | 6.46 (1.45)          | 9.84 (2.32)          |
| $CC_{1/2}$                                                      | 0.9903 (0.5421)      | 0.9956 (0.7576)      |
| $CC_{\text{ano}}$                                               | 0.0105               | 0.0511               |
| <b>SAD phasing</b>                                              |                      |                      |
| $CC_{\text{all}}, CC_{\text{weak}}$ (%; SHELXD)                 | 10.72, 5.54          | 16.01, 9.42          |
| Built residues, CC, FOM (SHELXE)                                | 192, 23.55%, 0.741   | 206, 27.76%, 0.775   |
| Rebuilt residues, $R_{\text{work}}/R_{\text{free}}$ (Buccaneer) | 318, 24.0%/24.9%     | 324, 23.4%/24.2%     |
| <b>Refinement</b>                                               |                      |                      |
| $R_{\text{work}}, R_{\text{free}}$                              | 0.1488, 0.1625       | 0.1414, 0.1534       |
| No. atoms (mean $B$ -factor)                                    |                      |                      |
| protein                                                         | 2432 (22.7)          | 2444 (22.1)          |
| water                                                           | 232 (40.2)           | 224 (38.9)           |
| ligand                                                          | 100 (22.6)           | 100 (21.5)           |
| r.m.s. deviation from ideal                                     |                      |                      |
| bond lengths (Å)                                                | 0.019                | 0.019                |
| bond angles (°)                                                 | 1.478                | 1.459                |
| Ramachandran plot                                               |                      |                      |
| Favored (%)                                                     | 97.19                | 96.57                |
| Allowed (%)                                                     | 2.81                 | 3.43                 |
| Outlier (%)                                                     | 0                    | 0                    |

<sup>†</sup>Values in parenthesis are for the highest-resolution shell.

Table S4: Data collection and refinement statistics of LRE-Hg derivative

|                                                                 | minimum patterns    | all patterns        |
|-----------------------------------------------------------------|---------------------|---------------------|
| Space group                                                     | $P2_12_12_1$        | $P2_12_12_1$        |
| Unit cell ( $a, b, c$ ; Å)                                      | 47.9, 77.0, 84.5    | 47.9, 77.0, 84.5    |
| Resolution range <sup>†</sup> (Å)                               | 25–1.50 (1.56–1.50) | 25–1.50 (1.56–1.50) |
| Completeness <sup>†</sup> (%)                                   | 96.73 (71.46)       | 99.19 (92.74)       |
| SFX multiplicity <sup>†</sup>                                   | 46.5 (3.6)          | 132.4 (6.1)         |
| No. crystals                                                    | 11,000              | 35,231              |
| $R_{\text{split}}$                                              | 0.2476 (2.598)      | 0.1474 (2.344)      |
| $\langle I/\sigma(I) \rangle$                                   | 2.7 (0.48)          | 4.4 (0.63)          |
| $CC_{1/2}$                                                      | 0.9245 (0.07867)    | 0.9755 (0.1006)     |
| $CC_{\text{ano}}$                                               | 0.01169             | 0.02952             |
| <b>SAD phasing</b>                                              |                     |                     |
| $CC_{\text{all}}, CC_{\text{weak}}$ (%; SHELXD)                 | 4.87, 2.39          | 15.71, 9.85         |
| Built residues, CC, FOM (SHELXE)                                | 292, 37.66%, 0.599  | 293, 41.87%, 0.635  |
| Rebuilt residues, $R_{\text{work}}/R_{\text{free}}$ (Buccaneer) | 308, 25.4%/26.7%    | 309, 23.5%/25.3%    |
| <b>Refinement</b>                                               |                     |                     |
| $R_{\text{work}}, R_{\text{free}}$                              | 0.1916, 0.2134      | 0.1755, 0.1976      |
| No. atoms (mean $B$ -factor)                                    |                     |                     |
| protein                                                         | 2397 (24.4)         | 2397 (24.2)         |
| water                                                           | 162 (34.3)          | 162 (34.1)          |
| ligand/ion                                                      | 9 (27.2)            | 9 (27.0)            |
| Hg                                                              | 2 (19.5)            | 2 (19.3)            |
| r.m.s. deviation from ideal                                     |                     |                     |
| bond lengths (Å)                                                | 0.007               | 0.007               |
| bond angles (°)                                                 | 1.130               | 1.129               |
| Ramachandran plot                                               |                     |                     |
| Favored (%)                                                     | 95.75               | 95.75               |
| Allowed (%)                                                     | 4.25                | 4.25                |
| Outlier (%)                                                     | 0                   | 0                   |

<sup>†</sup>Values in parenthesis are for the highest-resolution shell.

- 
- [1] Nakane, T. *et al.* Data processing pipeline for serial femtosecond crystallography at SACLA. *Journal of Applied Crystallography* **49**, 1035–1041 (2016).
- [2] Adams, P. D. *et al.* PHENIX: building new software for automated crystallographic structure determination. *Acta Crystallographica Section D* **58**, 1948–1954 (2002).
- [3] Grosse-Kunstleve, R. W., Sauter, N. K., Moriarty, N. W. & Adams, P. D. The *Computational Crystallography Toolbox*: crystallographic algorithms in a reusable software framework. *Journal of Applied Crystallography* **35**, 126–136 (2002).
- [4] Sheldrick, G. M. Experimental phasing with *SHELXC/D/E*: combining chain tracing with density modification. *Acta Crystallographica Section D* **66**, 479–485 (2010).
- [5] R Development Core Team. *R: A Language and Environment for Statistical Computing*. R Foundation for Statistical Computing, Vienna, Austria (2008).
- [6] Wickham, H. *ggplot2: elegant graphics for data analysis* (Springer New York, 2009).
- [7] White, T. A. *et al.* *CrystFEL*: a software suite for snapshot serial crystallography. *Journal of Applied Crystallography* **45**, 335–341 (2012).
- [8] Karplus, P. A. & Diederichs, K. Linking Crystallographic Model and Data Quality. *Science* **336**, 1030–1033 (2012).
